# Supplementary material for: Neuronal Menin Overexpression Rescues Learning and Memory Phenotype in CA1-Specific α7 nAChRs KD Mice
Source: MDPI journal article supplement (doi:10.3390/cells10123286), 2021-11-24
Supplement: s1 [file s1]

Supplementary Table S1. SP8 Leica (confocal) microscope settings. (Hotchkiss Brain Institute Advanced Microscopy Platform: **HBIAMP**, University of Calgary, AB, Canada)

| <b>Fluorescent microscope settings for data presented in:</b> | <b>SP8 Leica LIA - Laser Wavelength</b> | <b>Laser Power</b> |
|---------------------------------------------------------------|-----------------------------------------|--------------------|
| Figure 2                                                      | 405.7                                   | 4.5                |
|                                                               | 488.0                                   | 3.2                |
|                                                               | 580.0                                   | 5.0                |
| Figure 3                                                      | 402.7                                   | 5.0                |
|                                                               | 488.0                                   | 2.8                |
|                                                               | 580.0                                   | 4.5                |
| Figure 4                                                      | 405.7                                   | 3.5                |
|                                                               | 488                                     | 4.8                |
|                                                               | 580                                     | 3.6                |
|                                                               | 680.0                                   | 5.5                |
| Figure 5                                                      | 405.7                                   | 3.5                |
|                                                               | 488                                     | 4.6                |
|                                                               | 580.0                                   | 4.3                |
|                                                               | 680.0                                   | 4.5                |
| Figure 6                                                      | 405.7                                   | 2.5                |
|                                                               | 580.0                                   | 4.5                |
|                                                               | 488.0                                   | 5.7                |
| Figure 7                                                      | 402.7                                   | 2.5                |
|                                                               | 488.0                                   | 4.3                |
|                                                               | 580.0                                   | 5.5                |
| Figure 8 A                                                    | 402.7                                   | 2.5                |
|                                                               | 488.0                                   | 3.3                |
|                                                               | 680.0                                   | 6.5                |
| Figure 8B                                                     | 488.0                                   | 4.5                |
|                                                               | 580.0                                   | 5.0                |
|                                                               | 680.0                                   | 2.5                |
| Figure 9                                                      | 488.7                                   | 4.5                |
|                                                               | 580.0                                   | 5.3                |
|                                                               | 633.0                                   | 4.5                |
| Figure 10                                                     | 488.0                                   | 4.5                |
|                                                               | 580.0                                   | 4.0                |
|                                                               | 633.0                                   | 4.5                |
| Figure 10                                                     | 488.0                                   | 4.5                |
|                                                               | 580.0                                   | 4.0                |
|                                                               | 633.0                                   | 4.5                |

Supplementary Table S2. Related to Figure 1C. Statistical analysis of qPCR analysis of Multiple endocrine neoplasia type 1, *MEN1* gene, nAChRs neuronal subunits  $\alpha$ 2-7 and  $\beta$ 2-4 on DIV10 in-vitro and DIV20

| <b>Tukey's multiple comparisons test</b> | <b>Mean Diff.</b> | <b>95.00% CI of diff.</b> | <b>Below threshold?</b> | <b>Summary</b> | <b>Adjusted P Value</b> |
|------------------------------------------|-------------------|---------------------------|-------------------------|----------------|-------------------------|
| sca7a7 vs. sha7a7                        | 1.191             | 0.7825 to 1.600           | Yes                     | ****           | <0.0001                 |
| sca7men vs. sha7men                      | -2.693            | -3.102 to -2.284          | Yes                     | ****           | <0.0001                 |
| sca7a5 vs. sha7a5                        | -1.223            | -1.632 to -0.8143         | Yes                     | ****           | <0.0001                 |
| sca7a2 vs. sha7a2                        | -0.06474          | -0.4737 to 0.3443         | No                      | ns             | >0.9999                 |
| sca7a3 vs. sha7a3                        | 0.07709           | -0.3319 to 0.4861         | No                      | ns             | >0.9999                 |
| sca7a4 vs. sha7a4                        | 0.05592           | -0.3531 to 0.4649         | No                      | ns             | >0.9999                 |
| sca7a6 vs. sha7a6                        | 0.05886           | -0.3501 to 0.4679         | No                      | ns             | >0.9999                 |
| sca7b2 vs. sha7b2                        | -0.007246         | -0.4162 to 0.4017         | No                      | ns             | >0.9999                 |
| sca7b3 vs. sha7b3                        | -0.09094          | -0.4999 to 0.3181         | No                      | ns             | >0.9999                 |
| scab4 vs. sha7b4                         | -0.1199           | -0.5289 to 0.2891         | No                      | ns             | 0.9999                  |
| <b>DIV 20</b>                            |                   |                           |                         |                |                         |
| sca7a7 vs. sha7a7                        | 1.703             | 1.473 to 1.934            | Yes                     | ****           | <0.0001                 |
| sca7men vs. sha7men                      | 1.686             | 1.456 to 1.917            | Yes                     | ****           | <0.0001                 |
| sca7a5 vs. sha7a5                        | -0.1975           | -0.4280 to 0.03297        | No                      | ns             | 0.1846                  |
| sca7a2 vs. sha7a2                        | -0.03451          | -0.2650 to 0.1960         | No                      | ns             | >0.9999                 |
| sca7a3 vs. sha7a3                        | -0.08483          | -0.3153 to 0.1456         | No                      | ns             | 0.9976                  |
| sca7a4 vs. sha7a4                        | -0.04571          | -0.2762 to 0.1848         | No                      | ns             | >0.9999                 |
| sca7a6 vs. sha7a6                        | 0.1033            | -0.1272 to 0.3337         | No                      | ns             | 0.9783                  |
| sca7b2 vs. sha7b2                        | 0.05525           | -0.1752 to 0.2857         | No                      | ns             | >0.9999                 |
| sca7b3 vs. sha7b3                        | -0.07651          | -0.3070 to 0.1540         | No                      | ns             | 0.9994                  |

|                  |         |                   |    |    |         |
|------------------|---------|-------------------|----|----|---------|
| scab4 vs. sha7b4 | 0.01810 | -0.2124 to 0.2486 | No | ns | >0.9999 |
|------------------|---------|-------------------|----|----|---------|

One-way ANOVA followed by Post-hoc-Tukey's multiple comparison test  
qPCR (n=6, 3 independent experiments each, triplicate replicates)

Supplementary Table S3. Related to Figure 2B. Statistical analysis of ICC fluorescence of bungarotoxin labelled  $\alpha 7$  nAChRs in hippocampal neuronal cultures DIV 3-20

| Source of Variation | % of total variation | P value | P value summary | Significant ? |
|---------------------|----------------------|---------|-----------------|---------------|
| Interaction         | 22.95                | <0.0001 | ****            | Yes           |
| Row Factor          | 6.308                | <0.0001 | ****            | Yes           |
| Column Factor       | 69.75                | <0.0001 | ****            | Yes           |

| Tukey's multiple comparisons test            | Mean Diff. | 95.00% CI of diff. | Below threshold? | Summary | Adjusted P Value |
|----------------------------------------------|------------|--------------------|------------------|---------|------------------|
| DIV3: Control vs. $\alpha 7$ scrambled AAV   | -0.3333    | -5.478 to 4.811    | No               | ns      | >0.9999          |
| DIV3: Control vs. $\alpha 7$ shRNA AAV       | -1.833     | -6.978 to 3.311    | No               | ns      | 0.9962           |
| DIV7: Control vs $\alpha 7$ scrambled AAV    | -0.5833    | -5.728 to 4.561    | No               | ns      | >0.9999          |
| DIV7: Control vs. $\alpha 7$ shRNA AAV       | 55.00      | 49.86 to 60.14     | Yes              | ****    | <0.0001          |
| DIV10: Control vs. $\alpha 7$ scrambled AAV  | -0.8333    | -5.978 to 4.311    | No               | ns      | >0.9999          |
| DIV10: Control vs. $\alpha 7$ shRNA AAV      | 66.17      | 61.02 to 71.31     | Yes              | ****    | <0.0001          |
| DIV14: Control vs. $\alpha 7$ scrambled AAV  | -1.750     | -6.894 to 3.394    | No               | ns      | 0.9977           |
| DIV14: Control vs. $\alpha 7$ shRNA AAV      | 95.83      | 90.69 to 101.0     | Yes              | ****    | <0.0001          |
| DIV 20: Control vs. $\alpha 7$ scrambled AAV | -1.167     | -6.311 to 3.978    | No               | ns      | >0.9999          |

|                                          |       |                |     |      |         |
|------------------------------------------|-------|----------------|-----|------|---------|
| DIV 20: Control vs. $\alpha 7$ shRNA AAV | 94.08 | 88.94 to 99.23 | Yes | **** | <0.0001 |
|------------------------------------------|-------|----------------|-----|------|---------|

One-way ANOVA followed by Post-hoc-Tukey's multiple comparison test

n refers to the analysis of bungarotoxin labelled  $\alpha 7$  nAChRs puncta fluorescence intensity within neuronal cultures, ROIs derived from 30 separate images from 5 independent experiments, 6 samples

Supplementary Table S4. Related to Figure 3B. Statistical analysis of ICC fluorescence of menin-C in hippocampal neuronal cultures DIV 3-20

|                            |                        |         |                 |              |                              |
|----------------------------|------------------------|---------|-----------------|--------------|------------------------------|
| Two-way RM ANOVA           | Matching: Both factors |         |                 |              |                              |
| Assume sphericity?         | No                     |         |                 |              |                              |
| Alpha                      | 0.05                   |         |                 |              |                              |
| Source of Variation        | % of total variation   | P value | P value summary | Significant? | Geisser-Greenhouse's epsilon |
| Row Factor                 | 48.69                  | <0.0001 | ****            | Yes          | 0.6034                       |
| Column Factor              | 5.939                  | <0.0001 | ****            | Yes          | 0.7392                       |
| Row Factor x Column Factor | 43.06                  | <0.0001 | ****            | Yes          | 0.4046                       |
| Subject x Row Factor       | 0.6239                 |         |                 |              |                              |
| Subject x Column Factor    | 0.4324                 |         |                 |              |                              |
| Subject                    | 0.1858                 |         |                 |              |                              |

| Tukey's multiple comparisons test                 | Mean Diff. | 95.00% CI of diff. | Below threshold? | Summary | Adjusted P Value |
|---------------------------------------------------|------------|--------------------|------------------|---------|------------------|
| DIV3:Control vs. DIV3: $\alpha 7$ scrambled AAV   | -1.250     | -5.704 to 3.204    | No               | ns      | 0.9917           |
| DIV3:Control vs. DIV3: $\alpha 7$ shRNA AAV       | -9.667     | -13.47 to -5.863   | Yes              | ****    | <0.0001          |
| DIV7:Control vs. DIV7: $\alpha 7$ scrambled AAV   | 1.333      | -6.520 to 9.187    | No               | ns      | >0.9999          |
| DIV7:Control vs. DIV7: $\alpha 7$ shRNA AAV       | -24.50     | -31.00 to -18.00   | Yes              | ****    | <0.0001          |
| DIV10:Control vs. DIV10: $\alpha 7$ scrambled AAV | -1.000     | -4.253 to 2.253    | No               | ns      | 0.9827           |

|                                                           |         |                  |     |      |         |
|-----------------------------------------------------------|---------|------------------|-----|------|---------|
| DIV10:Control vs.<br>DIV10: $\alpha$ 7 shRNA<br>AAV       | -32.25  | -36.70 to -27.80 | Yes | **** | <0.0001 |
| DIV14:Control vs.<br>DIV14: $\alpha$ 7<br>scrambled AAV   | -0.8333 | -3.678 to 2.012  | No  | ns   | 0.9882  |
| DIV14:Control vs.<br>DIV14: $\alpha$ 7 shRNA<br>AAV       | -19.42  | -21.53 to -17.30 | Yes | **** | <0.0001 |
| DIV 20:Control vs.<br>DIV 20: $\alpha$ 7<br>scrambled AAV | -1.000  | -4.253 to 2.253  | No  | ns   | 0.9827  |
| DIV 20:Control vs.<br>DIV 20: $\alpha$ 7 shRNA<br>AAV     | 38.00   | 33.11 to 42.89   | Yes | **** | <0.0001 |

One-way ANOVA followed by Post-hoc-Tukey's multiple comparison test

n refers to the analysis of menin-C puncta fluorescence intensity within neuronal cultures, ROIs derived from 30 separate images from 5 independent experiments, 6 samples

Supplementary Table S5. Related to Figure 4B. Statistical analysis of ICC fluorescence of PSD-95 in hippocampal neuronal cultures DIV 3-20

| <b>Tukey's multiple comparisons test</b>                | <b>Mean Diff.</b> | <b>95.00% CI of diff.</b> | <b>Below threshold?</b> | <b>Summary</b> | <b>Adjusted P Value</b> |
|---------------------------------------------------------|-------------------|---------------------------|-------------------------|----------------|-------------------------|
| DIV3:Control vs.<br>DIV3: $\alpha$ 7<br>scrambled AAV   | 0.6667            | -2.510 to 3.843           | No                      | ns             | >0.9999                 |
| DIV3:Control vs.<br>DIV3: $\alpha$ 7 shRNA<br>AAV       | -0.9167           | -4.093 to 2.260           | No                      | ns             | 0.9982                  |
| DIV7:Control vs.<br>DIV7: $\alpha$ 7<br>scrambled AAV   | -1.583            | -4.760 to 1.593           | No                      | ns             | 0.8832                  |
| DIV7:Control vs.<br>DIV7: $\alpha$ 7 shRNA<br>AAV       | 32.83             | 29.66 to 36.01            | Yes                     | ****           | <0.0001                 |
| DIV10:Control vs.<br>DIV10: $\alpha$ 7<br>scrambled AAV | -2.750            | -5.926 to 0.4262          | No                      | ns             | 0.1601                  |
| DIV10:Control vs.<br>DIV10: $\alpha$ 7 shRNA<br>AAV     | 37.33             | 34.16 to 40.51            | Yes                     | ****           | <0.0001                 |

|                                                         |       |                 |     |      |         |
|---------------------------------------------------------|-------|-----------------|-----|------|---------|
| DIV14:Control vs.<br>DIV14: $\alpha$ 7<br>scrambled AAV | 1.750 | -1.426 to 4.926 | No  | ns   | 0.7966  |
| DIV14:Control vs.<br>DIV14: $\alpha$ 7 shRNA<br>AAV     | 24.25 | 21.07 to 27.43  | Yes | **** | <0.0001 |

One-way ANOVA followed by Post-hoc-Tukey's multiple comparison test

n refers to the analysis of PSD-95 puncta fluorescence intensity within neuronal cultures, ROIs derived from 30 separate images from 5 independent experiments, 6 samples

Supplementary Table S6. Related to Figure 5B. Statistical analysis of ICC fluorescence of SYT in hippocampal neuronal cultures DIV 3-20

| <b>Tukey's multiple comparisons test</b>                | <b>Mean Diff.</b> | <b>95.00% CI of diff.</b> | <b>Below threshold?</b> | <b>Summary</b> | <b>Adjusted P Value</b> |
|---------------------------------------------------------|-------------------|---------------------------|-------------------------|----------------|-------------------------|
| DIV3:Control vs.<br>DIV3: $\alpha$ 7<br>scrambled AAV   | -1.449            | -5.814 to 2.917           | No                      | ns             | 0.9940                  |
| DIV3:Control vs.<br>DIV3: $\alpha$ 7 shRNA<br>AAV       | -4.782            | -9.148 to -0.4163         | Yes                     | *              | 0.0190                  |
| DIV7:Control vs.<br>DIV7: $\alpha$ 7<br>scrambled AAV   | 0.000             | -4.452 to 4.452           | No                      | ns             | >0.9999                 |
| DIV7:Control vs.<br>DIV7: $\alpha$ 7 shRNA<br>AAV       | -28.33            | -32.79 to -23.88          | Yes                     | ****           | <0.0001                 |
| DIV10:Control vs.<br>DIV10: $\alpha$ 7<br>scrambled AAV | 0.5000            | -3.952 to 4.952           | No                      | ns             | >0.9999                 |
| DIV10:Control vs.<br>DIV10: $\alpha$ 7 shRNA<br>AAV     | -33.92            | -38.37 to -29.46          | Yes                     | ****           | <0.0001                 |
| DIV14:Control vs.<br>DIV14: $\alpha$ 7<br>scrambled AAV | -2.917            | -7.369 to 1.535           | No                      | ns             | 0.5672                  |
| DIV14:Control vs.<br>DIV14: $\alpha$ 7 shRNA<br>AAV     | -25.92            | -30.37 to -21.46          | Yes                     | ****           | <0.0001                 |

One-way ANOVA followed by Post-hoc-Tukey's multiple comparison test

n refers to the analysis of PSD-95 puncta fluorescence intensity within neuronal cultures, ROIs derived from 30 separate images from 5 independent experiments, 6 samples

Supplementary Table S7. Related to Figure 6B. Statistical analysis of qPCR analysis of Multiple endocrine neoplasia type 1, *MEN1* gene, nAChRs neuronal subunits  $\alpha$ 2-7 and  $\beta$ 2-4 in CA1 hippocampal tissue of  $\alpha$ 7 knockdown (KD) mice versus its scrambled control

| <b>Tukey's multiple comparisons test</b> | <b>Mean Diff.</b> | <b>95.00% CI of diff.</b> | <b>Below threshold?</b> | <b>Summary</b> | <b>Adjusted P Value</b> |
|------------------------------------------|-------------------|---------------------------|-------------------------|----------------|-------------------------|
| sca7a7 vs. sha7a7                        | 1.118             | 0.8411 to 1.395           | Yes                     | ****           | <0.0001                 |
| sca7men vs. sha7men                      | 1.114             | 0.8375 to 1.391           | Yes                     | ****           | <0.0001                 |
| sca7a5 vs. sha7a5                        | 0.2991            | 0.02234 to 0.5759         | Yes                     | *              | 0.0202                  |
| sca7a2 vs. sha7a2                        | -0.2821           | -0.5589 to -0.005361      | Yes                     | *              | 0.0405                  |
| sca7a3 vs. sha7a3                        | -0.3566           | -0.6334 to -0.07986       | Yes                     | **             | 0.0014                  |
| sca7a4 vs. sha7a4                        | 0.2134            | -0.06335 to 0.4902        | No                      | ns             | 0.3752                  |
| sca7a6 vs. sha7a6                        | -0.1404           | -0.4171 to 0.1364         | No                      | ns             | 0.9568                  |
| sca7b2 vs. sha7b2                        | -0.1176           | -0.3944 to 0.1592         | No                      | ns             | 0.9942                  |
| scaSYP vs. sha7SYP                       | -1.294            | -1.570 to -1.017          | Yes                     | ****           | <0.0001                 |
| scaPSD-95 vs. sha7PSD-95                 | 0.6932            | 0.4164 to 0.9700          | Yes                     | ****           | <0.0001                 |
| sca7b3 vs. sha7b3                        | -0.1110           | -0.3878 to 0.1658         | No                      | ns             | 0.9973                  |
| scab4 vs. sha7b4                         | -0.1194           | -0.3962 to 0.1573         | No                      | ns             | 0.9930                  |

One-way ANOVA followed by Post-hoc-Tukey's multiple comparison test  
qPCR (n=6, 4 independent experiments each, triplicate replicates)

Supplementary Table S8. Related to Figure 6C. Statistical analysis of IHC fluorescence of bungarotoxin labelled  $\alpha$ 7 nAChRs in hippocampal brain slices in 8 weeks old mice

| <b>Tukey's multiple comparisons test</b>          | <b>Mean Diff.</b> | <b>95.00% CI of diff.</b> | <b>Below threshold?</b> | <b>Summary</b> | <b>Adjusted P Value</b> |
|---------------------------------------------------|-------------------|---------------------------|-------------------------|----------------|-------------------------|
| un-treated control vs. $\alpha$ 7 scrambled AAV   | -4.667            | -13.91 to 4.580           | No                      | ns             | 0.4395                  |
| un-treated control vs. $\alpha$ 7 shRNA AAV       | 122.3             | 113.1 to 131.6            | Yes                     | ****           | <0.0001                 |
| $\alpha$ 7 scrambled AAV vs. $\alpha$ 7 shRNA AAV | 127.0             | 117.8 to 136.2            | Yes                     | ****           | <0.0001                 |

One-way ANOVA followed by Post-hoc-Tukey's multiple comparison test  
n refers to the analysis of bungarotoxin labelled  $\alpha$ 7 nAChRs puncta fluorescence intensity within hippocampal brain slices, ROIs derived from 20 separate images from 5 independent experiments, 6 samples

Supplementary Table S9. Related to Figure 7B. Statistical analysis of IHC fluorescence of menin-C puncta in scrambled control and  $\alpha 7$ -KD hippocampal brain slices in 8 weeks old mice

| <b>Tukey's multiple comparisons test</b>          | <b>Mean Diff.</b> | <b>95.00% CI of diff.</b> | <b>Below threshold?</b> | <b>Summary</b> | <b>Adjusted P Value</b> |
|---------------------------------------------------|-------------------|---------------------------|-------------------------|----------------|-------------------------|
| un-treated control vs. $\alpha 7$ scrambled AAV   | -0.4167           | -2.919 to 2.085           | No                      | ns             | 0.9123                  |
| un-treated control vs. $\alpha 7$ shRNA AAV       | 94.42             | 91.91 to 96.92            | Yes                     | ****           | <0.0001                 |
| $\alpha 7$ scrambled AAV vs. $\alpha 7$ shRNA AAV | 94.83             | 92.33 to 97.34            | Yes                     | ****           | <0.0001                 |

One-way ANOVA followed by Post-hoc-Tukey's multiple comparison test

n refers to the analysis of menin-C puncta fluorescence intensity within hippocampal brain slices, ROIs derived from 20 separate images from 5 independent experiments, 6 samples

Supplementary Table S10. Related to Figure 7C. Statistical analysis of IHC fluorescence of PSD-95 puncta in scrambled control and  $\alpha 7$ -KD hippocampal brain slices in 8 weeks old mice

| <b>Dunnett's multiple comparisons test</b>      | <b>Mean Diff.</b> | <b>95.00% CI of diff.</b> | <b>Below threshold?</b> | <b>Summary</b> | <b>Adjusted P Value</b> |
|-------------------------------------------------|-------------------|---------------------------|-------------------------|----------------|-------------------------|
| untreated controls vs. $\alpha 7$ scrambled AAV | 1.000             | -3.278 to 5.278           | No                      | ns             | 0.8088                  |
| untreated controls vs. $\alpha 7$ shRNA AAV     | 41.30             | 37.02 to 45.58            | Yes                     | ****           | <0.0001                 |

One-way ANOVA followed by Post-hoc-Tukey's multiple comparison test

n refers to the analysis of PSD-95 fluorescence intensity within hippocampal brain slices, ROIs derived from 20 separate images from 5 independent experiments, 6 samples



Supplementary Table S11. Related to Figure 7D. Statistical analysis of IHC fluorescence of SYT puncta in scrambled control and  $\alpha 7$ -KD hippocampal brain slices in 8 weeks old mice

| Dunnett's multiple comparisons test             | Mean Diff. | 95.00% CI of diff. | Below threshold? | Summary | Adjusted P Value |
|-------------------------------------------------|------------|--------------------|------------------|---------|------------------|
| untreated controls vs. $\alpha 7$ scrambled AAV | -0.1667    | -3.574 to 3.241    | No               | ns      | 0.9907           |
| untreated controls vs. $\alpha 7$ shRNA AAV     | -22.58     | -25.99 to -19.18   | Yes              | ****    | <0.0001          |

One-way ANOVA followed by Dunnett's multiple comparison test

n refers to the analysis of SYT fluorescence intensity within hippocampal brain slices, ROIs derived from 20 separate images from 5 independent experiments, 6 samples

Supplementary Table S12. Related to Figure 8A. Mean comparison of degree of colocalization of NFL with GFP in mouse hippocampus

| One sample t test         |               |               |               |               |
|---------------------------|---------------|---------------|---------------|---------------|
| t, df                     | t=7.821, df=9 | t=8.162, df=9 | t=12.88, df=9 | t=9.362, df=9 |
| P value (two tailed)      | <0.0001       | <0.0001       | <0.0001       | <0.0001       |
| P value summary           | ****          | ****          | ****          | ****          |
| Significant (alpha=0.05)? | Yes           | Yes           | Yes           | Yes           |
|                           |               |               |               |               |

One sample t-test

n refers to the analysis of NFL and GFP D.O.C. in mouse brain CA1 region, ROIs derived from 35 separate images from 6 independent experiments

Supplementary Table S13. Related to Figure 8C. Statistical analysis of ICC fluorescence of menin-C in hippocampal neuronal cultures DIV 3-20 in  $\alpha 7$  nAChR scrambled AAV,  $\alpha 7$  nAChR shRNA AAV,  $\alpha 7$  nAChR scrambled AAV+MEN1,  $\alpha 7$  nAChR AAV+MEN1AAV and  $\alpha 7$  nAChR AAV+GFP AAV neuronal cultures compared to relevant controls

| Tukey's multiple comparisons test                          | Mean Diff. | 95.00% CI of diff. | Below threshold? | Summary | Adjusted P Value |
|------------------------------------------------------------|------------|--------------------|------------------|---------|------------------|
| Row 1                                                      |            |                    |                  |         |                  |
| $\alpha 7$ scrambled AAV vs. $\alpha 7$ shRNA AAV          | -8.417     | -14.67 to -2.165   | Yes              | **      | 0.0024           |
| $\alpha 7$ scrambled AAV vs. $\alpha 7$ shRNA+GFP          | -6.000     | -12.25 to 0.2519   | No               | ns      | 0.0668           |
| $\alpha 7$ scrambled AAV vs. $\alpha 7$ scrambled+MEN1 AAV | -4.083     | -10.34 to 2.169    | No               | ns      | 0.3794           |
| $\alpha 7$ scrambled AAV vs. $\alpha 7$ shRNA+MEN1 AAV     | -10.42     | -16.67 to -4.165   | Yes              | ****    | <0.0001          |
| $\alpha 7$ shRNA AAV vs. $\alpha 7$ shRNA+GFP              | 2.417      | -3.835 to 8.669    | No               | ns      | 0.8261           |
| $\alpha 7$ shRNA AAV vs. $\alpha 7$ scrambled+MEN1 AAV     | 4.333      | -1.919 to 10.59    | No               | ns      | 0.3180           |
| $\alpha 7$ shRNA AAV vs. $\alpha 7$ shRNA+MEN1 AAV         | -2.000     | -8.252 to 4.252    | No               | ns      | 0.9047           |
| $\alpha 7$ shRNA+GFP vs. $\alpha 7$ scrambled+MEN1 AAV     | 1.917      | -4.335 to 8.169    | No               | ns      | 0.9173           |
| $\alpha 7$ shRNA+GFP vs. $\alpha 7$ shRNA+MEN1 AAV         | -4.417     | -10.67 to 1.835    | No               | ns      | 0.2988           |
| Row 2                                                      |            |                    |                  |         |                  |
| $\alpha 7$ scrambled AAV vs. $\alpha 7$ shRNA AAV          | -25.83     | -32.09 to -19.58   | Yes              | ****    | <0.0001          |
| $\alpha 7$ scrambled AAV vs. $\alpha 7$ shRNA+GFP          | -26.92     | -33.17 to -20.66   | Yes              | ****    | <0.0001          |
| $\alpha 7$ scrambled AAV vs. $\alpha 7$ scrambled+MEN1 AAV | -29.75     | -36.00 to -23.50   | Yes              | ****    | <0.0001          |
| $\alpha 7$ scrambled AAV vs. $\alpha 7$ shRNA+MEN1 AAV     | -24.75     | -31.00 to -18.50   | Yes              | ****    | <0.0001          |
| $\alpha 7$ shRNA AAV vs. $\alpha 7$ shRNA+GFP              | -1.083     | -7.335 to 5.169    | No               | ns      | 0.9895           |
| $\alpha 7$ shRNA AAV vs. $\alpha 7$ scrambled+MEN1 AAV     | -3.917     | -10.17 to 2.335    | No               | ns      | 0.4232           |
| $\alpha 7$ shRNA AAV vs. $\alpha 7$ shRNA+MEN1 AAV         | 1.083      | -5.169 to 7.335    | No               | ns      | 0.9895           |

|                                                             |         |                  |     |      |         |
|-------------------------------------------------------------|---------|------------------|-----|------|---------|
| $\alpha 7$ shRNA+GFP vs. $\alpha 7$ scrambled+MEN1 AAV      | -2.833  | -9.085 to 3.419  | No  | ns   | 0.7253  |
| $\alpha 7$ shRNA+GFP vs. $\alpha 7$ shRNA+MEN1 AAV          | 2.167   | -4.085 to 8.419  | No  | ns   | 0.8762  |
| $\alpha 7$ scrambled+MEN1 AAV vs. $\alpha 7$ shRNA+MEN1 AAV | 5.000   | -1.252 to 11.25  | No  | ns   | 0.1842  |
| Row 2                                                       |         |                  |     |      |         |
| $\alpha 7$ scrambled AAV vs. $\alpha 7$ shRNA AAV           | -25.83  | -32.09 to -19.58 | Yes | **** | <0.0001 |
| $\alpha 7$ scrambled AAV vs. $\alpha 7$ shRNA+GFP           | -26.92  | -33.17 to -20.66 | Yes | **** | <0.0001 |
| $\alpha 7$ scrambled AAV vs. $\alpha 7$ scrambled+MEN1 AAV  | -29.75  | -36.00 to -23.50 | Yes | **** | <0.0001 |
| $\alpha 7$ scrambled AAV vs. $\alpha 7$ shRNA+MEN1 AAV      | -24.75  | -31.00 to -18.50 | Yes | **** | <0.0001 |
| $\alpha 7$ shRNA AAV vs. $\alpha 7$ shRNA+GFP               | -1.083  | -7.335 to 5.169  | No  | ns   | 0.9895  |
| Row 3                                                       |         |                  |     |      |         |
| $\alpha 7$ scrambled AAV vs. $\alpha 7$ shRNA AAV           | -31.25  | -37.50 to -25.00 | Yes | **** | <0.0001 |
| $\alpha 7$ scrambled AAV vs. $\alpha 7$ shRNA+GFP           | -32.33  | -38.59 to -26.08 | Yes | **** | <0.0001 |
| $\alpha 7$ scrambled AAV vs. $\alpha 7$ scrambled+MEN1 AAV  | -32.58  | -38.84 to -26.33 | Yes | **** | <0.0001 |
| $\alpha 7$ scrambled AAV vs. $\alpha 7$ shRNA+MEN1 AAV      | -23.25  | -29.50 to -17.00 | Yes | **** | <0.0001 |
| $\alpha 7$ shRNA AAV vs. $\alpha 7$ shRNA+GFP               | -1.083  | -7.335 to 5.169  | No  | ns   | 0.9895  |
| $\alpha 7$ shRNA AAV vs. $\alpha 7$ scrambled+MEN1 AAV      | -1.333  | -7.585 to 4.919  | No  | ns   | 0.9771  |
| $\alpha 7$ shRNA AAV vs. $\alpha 7$ shRNA+MEN1 AAV          | 8.000   | 1.748 to 14.25   | Yes | **   | 0.0047  |
| $\alpha 7$ shRNA+GFP vs. $\alpha 7$ scrambled+MEN1 AAV      | -0.2500 | -6.502 to 6.002  | No  | ns   | >0.9999 |

|                                                             |        |                  |     |      |         |
|-------------------------------------------------------------|--------|------------------|-----|------|---------|
| $\alpha 7$ shRNA+GFP vs. $\alpha 7$ shRNA+MEN1 AAV          | 9.083  | 2.831 to 15.34   | Yes | ***  | 0.0008  |
| $\alpha 7$ scrambled+MEN1 AAV vs. $\alpha 7$ shRNA+MEN1 AAV | 9.333  | 3.081 to 15.59   | Yes | ***  | 0.0005  |
| Row 3                                                       |        |                  |     |      |         |
| $\alpha 7$ scrambled AAV vs. $\alpha 7$ shRNA AAV           | -31.25 | -37.50 to -25.00 | Yes | **** | <0.0001 |
| $\alpha 7$ scrambled AAV vs. $\alpha 7$ shRNA+GFP           | -32.33 | -38.59 to -26.08 | Yes | **** | <0.0001 |
| $\alpha 7$ scrambled AAV vs. $\alpha 7$ scrambled+MEN1 AAV  | -32.58 | -38.84 to -26.33 | Yes | **** | <0.0001 |
| $\alpha 7$ scrambled AAV vs. $\alpha 7$ shRNA+MEN1 AAV      | -23.25 | -29.50 to -17.00 | Yes | **** | <0.0001 |
| $\alpha 7$ shRNA AAV vs. $\alpha 7$ shRNA+GFP               | -1.083 | -7.335 to 5.169  | No  | ns   | 0.9895  |
| Row 4                                                       |        |                  |     |      |         |
| $\alpha 7$ scrambled AAV vs. $\alpha 7$ shRNA AAV           | -18.58 | -24.84 to -12.33 | Yes | **** | <0.0001 |
| $\alpha 7$ scrambled AAV vs. $\alpha 7$ shRNA+GFP           | -15.75 | -22.00 to -9.498 | Yes | **** | <0.0001 |
| $\alpha 7$ scrambled AAV vs. $\alpha 7$ scrambled+MEN1 AAV  | -35.83 | -42.09 to -29.58 | Yes | **** | <0.0001 |
| $\alpha 7$ scrambled AAV vs. $\alpha 7$ shRNA+MEN1 AAV      | -20.00 | -26.25 to -13.75 | Yes | **** | <0.0001 |
| $\alpha 7$ shRNA AAV vs. $\alpha 7$ shRNA+GFP               | 2.833  | -3.419 to 9.085  | No  | ns   | 0.7253  |
| $\alpha 7$ shRNA AAV vs. $\alpha 7$ scrambled+MEN1 AAV      | -17.25 | -23.50 to -11.00 | Yes | **** | <0.0001 |
| $\alpha 7$ shRNA AAV vs. $\alpha 7$ shRNA+MEN1 AAV          | -1.417 | -7.669 to 4.835  | No  | ns   | 0.9714  |
| $\alpha 7$ shRNA+GFP vs. $\alpha 7$ scrambled+MEN1 AAV      | -20.08 | -26.34 to -13.83 | Yes | **** | <0.0001 |
| $\alpha 7$ shRNA+GFP vs. $\alpha 7$ shRNA+MEN1 AAV          | -4.250 | -10.50 to 2.002  | No  | ns   | 0.3379  |

|                                                             |        |                  |     |      |         |
|-------------------------------------------------------------|--------|------------------|-----|------|---------|
| $\alpha 7$ scrambled+MEN1 AAV vs. $\alpha 7$ shRNA+MEN1 AAV | 15.83  | 9.581 to 22.09   | Yes | **** | <0.0001 |
| Row 4                                                       |        |                  |     |      |         |
| $\alpha 7$ scrambled AAV vs. $\alpha 7$ shRNA AAV           | -18.58 | -24.84 to -12.33 | Yes | **** | <0.0001 |
| $\alpha 7$ scrambled AAV vs. $\alpha 7$ shRNA+GFP           | -15.75 | -22.00 to -9.498 | Yes | **** | <0.0001 |
| $\alpha 7$ scrambled AAV vs. $\alpha 7$ scrambled+MEN1 AAV  | -35.83 | -42.09 to -29.58 | Yes | **** | <0.0001 |
| $\alpha 7$ scrambled AAV vs. $\alpha 7$ shRNA+MEN1 AAV      | -20.00 | -26.25 to -13.75 | Yes | **** | <0.0001 |
| $\alpha 7$ shRNA AAV vs. $\alpha 7$ shRNA+GFP               | 2.833  | -3.419 to 9.085  | No  | ns   | 0.7253  |
| $\alpha 7$ shRNA AAV vs. $\alpha 7$ scrambled+MEN1 AAV      | -17.25 | -23.50 to -11.00 | Yes | **** | <0.0001 |
| $\alpha 7$ shRNA AAV vs. $\alpha 7$ shRNA+MEN1 AAV          | -1.417 | -7.669 to 4.835  | No  | ns   | 0.9714  |
| $\alpha 7$ shRNA+GFP vs. $\alpha 7$ scrambled+MEN1 AAV      | -20.08 | -26.34 to -13.83 | Yes | **** | <0.0001 |
| $\alpha 7$ shRNA+GFP vs. $\alpha 7$ shRNA+MEN1 AAV          | -4.250 | -10.50 to 2.002  | No  | ns   | 0.3379  |
| Row 5                                                       |        |                  |     |      |         |
| $\alpha 7$ scrambled AAV vs. $\alpha 7$ shRNA AAV           | 39.00  | 32.75 to 45.25   | Yes | **** | <0.0001 |
| $\alpha 7$ scrambled AAV vs. $\alpha 7$ shRNA+GFP           | 41.67  | 35.41 to 47.92   | Yes | **** | <0.0001 |
| $\alpha 7$ scrambled AAV vs. $\alpha 7$ scrambled+MEN1 AAV  | -51.83 | -58.09 to -45.58 | Yes | **** | <0.0001 |
| $\alpha 7$ scrambled AAV vs. $\alpha 7$ shRNA+MEN1 AAV      | -20.25 | -26.50 to -14.00 | Yes | **** | <0.0001 |
| $\alpha 7$ shRNA AAV vs. $\alpha 7$ shRNA+GFP               | 2.667  | -3.585 to 8.919  | No  | ns   | 0.7678  |
| $\alpha 7$ shRNA AAV vs. $\alpha 7$ scrambled+MEN1 AAV      | -90.83 | -97.09 to -84.58 | Yes | **** | <0.0001 |

|                                                             |        |                  |     |      |         |
|-------------------------------------------------------------|--------|------------------|-----|------|---------|
| $\alpha 7$ shRNA AAV vs. $\alpha 7$ shRNA+MEN1 AAV          | -59.25 | -65.50 to -53.00 | Yes | **** | <0.0001 |
| $\alpha 7$ shRNA+GFP vs. $\alpha 7$ scrambled+MEN1 AAV      | -93.50 | -99.75 to -87.25 | Yes | **** | <0.0001 |
| $\alpha 7$ shRNA+GFP vs. $\alpha 7$ shRNA+MEN1 AAV          | -61.92 | -68.17 to -55.66 | Yes | **** | <0.0001 |
| $\alpha 7$ scrambled+MEN1 AAV vs. $\alpha 7$ shRNA+MEN1 AAV | 31.58  | 25.33 to 37.84   | Yes | **** | <0.0001 |
| Row 5                                                       |        |                  |     |      |         |
| $\alpha 7$ scrambled AAV vs. $\alpha 7$ shRNA AAV           | 39.00  | 32.75 to 45.25   | Yes | **** | <0.0001 |
| $\alpha 7$ scrambled AAV vs. $\alpha 7$ shRNA+GFP           | 41.67  | 35.41 to 47.92   | Yes | **** | <0.0001 |
| $\alpha 7$ scrambled AAV vs. $\alpha 7$ scrambled+MEN1 AAV  | -51.83 | -58.09 to -45.58 | Yes | **** | <0.0001 |
| $\alpha 7$ scrambled AAV vs. $\alpha 7$ shRNA+MEN1 AAV      | -20.25 | -26.50 to -14.00 | Yes | **** | <0.0001 |
| $\alpha 7$ shRNA AAV vs. $\alpha 7$ shRNA+GFP               | 2.667  | -3.585 to 8.919  | No  | ns   | 0.7678  |
| $\alpha 7$ shRNA AAV vs. $\alpha 7$ scrambled+MEN1 AAV      | -90.83 | -97.09 to -84.58 | Yes | **** | <0.0001 |
| $\alpha 7$ shRNA AAV vs. $\alpha 7$ shRNA+MEN1 AAV          | -59.25 | -65.50 to -53.00 | Yes | **** | <0.0001 |
| $\alpha 7$ shRNA+GFP vs. $\alpha 7$ scrambled+MEN1 AAV      | -93.50 | -99.75 to -87.25 | Yes | **** | <0.0001 |
| $\alpha 7$ shRNA+GFP vs. $\alpha 7$ shRNA+MEN1 AAV          | -61.92 | -68.17 to -55.66 | Yes | **** | <0.0001 |
| $\alpha 7$ scrambled+MEN1 AAV vs. $\alpha 7$ shRNA+MEN1 AAV | 31.58  | 25.33 to 37.84   | Yes | **** | <0.0001 |

Two-way ANOVA followed by Post-hoc-Tukey's multiple comparison test

n refers to the analysis of menin-C puncta fluorescence intensity within neuronal cultures, ROIs derived from 25 separate images from 5 independent experiments, 7 samples

Supplementary Table S14. Related to Figure 8D. Statistical analysis of IHC fluorescence of menin-C in  $\alpha 7$  nAChR scrambled AAV,  $\alpha 7$  nAChR shRNA AAV,  $\alpha 7$  nAChR scrambled AAV+MEN1,  $\alpha 7$  nAChR AAV+MEN1AAV and  $\alpha 7$  nAChR AAV+GFP AAV CA1 hippocampal slices compared to relevant controls

| Šídák's multiple comparisons test                            | Mean Diff. | 95.00% CI of diff. | Below threshold ? | Summary | Adjusted P Value |
|--------------------------------------------------------------|------------|--------------------|-------------------|---------|------------------|
| $\alpha 7$ scrambled AAV vs. $\alpha 7$ shRNA AAV            | 55.80      | 48.01 to 63.59     | Yes               | ****    | <0.0001          |
| $\alpha 7$ scrambled AAV vs. $\alpha 7$ scrambled +MEN1 AAV  | - 32.90    | -40.69 to - 25.11  | Yes               | ****    | <0.0001          |
| $\alpha 7$ scrambled AAV vs. $\alpha 7$ shRNA+MEN1 AAV       | 1.800      | -5.986 to 9.586    | No                | ns      | 0.9990           |
| $\alpha 7$ scrambled AAV vs. $\alpha 7$ shRNA+GFP            | 52.90      | 45.11 to 60.69     | Yes               | ****    | <0.0001          |
| $\alpha 7$ shRNA AAV vs. $\alpha 7$ scrambled +MEN1 AAV      | - 88.70    | -96.49 to - 80.91  | Yes               | ****    | <0.0001          |
| $\alpha 7$ shRNA AAV vs. $\alpha 7$ shRNA+MEN1 AAV           | - 54.00    | -61.79 to - 46.21  | Yes               | ****    | <0.0001          |
| $\alpha 7$ shRNA AAV vs. $\alpha 7$ shRNA+GFP                | - 2.900    | -10.69 to 4.886    | No                | ns      | 0.9619           |
| $\alpha 7$ scrambled +MEN1 AAV vs. $\alpha 7$ shRNA+MEN1 AAV | 34.70      | 26.91 to 42.49     | Yes               | ****    | <0.0001          |
| $\alpha 7$ scrambled +MEN1 AAV vs. $\alpha 7$ shRNA+GFP      | 85.80      | 78.01 to 93.59     | Yes               | ****    | <0.0001          |
| $\alpha 7$ shRNA+MEN1 AAV vs. $\alpha 7$ shRNA+GFP           | 51.10      | 43.31 to 58.89     | Yes               | ****    | <0.0001          |
| Šídák's multiple comparisons test                            | Mean Diff. | 95.00% CI of diff. | Below threshold?  | Summary | Adjusted P Value |
| $\alpha 7$ scrambled AAV vs. $\alpha 7$ shRNA AAV            | 55.80      | 48.01 to 63.59     | Yes               | ****    | <0.0001          |
| $\alpha 7$ scrambled AAV vs. $\alpha 7$ scrambled +MEN1 AAV  | - 32.90    | -40.69 to - 25.11  | Yes               | ****    | <0.0001          |
| $\alpha 7$ scrambled AAV vs. $\alpha 7$ shRNA+MEN1 AAV       | 1.800      | -5.986 to 9.586    | No                | ns      | 0.9990           |
| $\alpha 7$ scrambled AAV vs. $\alpha 7$ shRNA+GFP            | 52.90      | 45.11 to 60.69     | Yes               | ****    | <0.0001          |
| $\alpha 7$ shRNA AAV vs. $\alpha 7$ scrambled +MEN1 AAV      | - 88.70    | -96.49 to - 80.91  | Yes               | ****    | <0.0001          |
| $\alpha 7$ shRNA AAV vs. $\alpha 7$ shRNA+MEN1 AAV           | - 54.00    | -61.79 to - 46.21  | Yes               | ****    | <0.0001          |

|                                                              |        |                 |     |      |         |
|--------------------------------------------------------------|--------|-----------------|-----|------|---------|
| $\alpha 7$ shRNA AAV vs. $\alpha 7$ shRNA+GFP                | -2.900 | -10.69 to 4.886 | No  | ns   | 0.9619  |
| $\alpha 7$ scrambled +MEN1 AAV vs. $\alpha 7$ shRNA+MEN1 AAV | 34.70  | 26.91 to 42.49  | Yes | **** | <0.0001 |
| $\alpha 7$ scrambled +MEN1 AAV vs. $\alpha 7$ shRNA+GFP      | 85.80  | 78.01 to 93.59  | Yes | **** | <0.0001 |
| $\alpha 7$ shRNA+MEN1 AAV vs. $\alpha 7$ shRNA+GFP           | 51.10  | 43.31 to 58.89  | Yes | **** | <0.0001 |

Two-way ANOVA followed by Sidak's multiple comparison test

n refers to the analysis of menin-C puncta fluorescence intensity within neuronal cultures, ROIs derived from 30 separate images from 5 independent experiments, 7 samples

Supplementary Table S15. Related to Figure 9A. Statistical analysis of qPCR analysis of Multiple endocrine neoplasia type 1, *MEN1* gene, nAChRs neuronal subunits  $\alpha 2$ -7 and  $\beta 2$ -4 in  $\alpha 7$  nAChR scrambled AAV,  $\alpha 7$  nAChR shRNA AAV,  $\alpha 7$  nAChR scrambled AAV+MEN1,  $\alpha 7$  nAChR AAV+MEN1AAV and  $\alpha 7$  nAChR AAV+GFP AAV hippocampal neuronal cultures

| <b>Šidák's multiple comparisons test</b> | <b>Mean Diff.</b> | <b>95.00% CI of diff.</b> | <b>Below threshold?</b> | <b>Summary</b> | <b>Adjusted P Value</b> |
|------------------------------------------|-------------------|---------------------------|-------------------------|----------------|-------------------------|
| sca7men vs. sca7a7                       | -0.02612          | -0.3943 to 0.3420         | No                      | ns             | >0.9999                 |
| sca7men vs. sha7men                      | 1.091             | 0.8959 to 1.287           | Yes                     | ***            | 0.0003                  |
| sca7men vs. sha7a7                       | 1.103             | 0.8114 to 1.394           | Yes                     | ***            | 0.0010                  |
| sca7men vs. sca7+MEN1men                 | -1.252            | -1.485 to -1.020          | Yes                     | ***            | 0.0003                  |
| sca7men vs. sca7+MEN1a7                  | -1.907            | -2.479 to -1.335          | Yes                     | **             | 0.0014                  |
| sca7men vs. shRNA7+GFPmen                | 1.100             | 0.8731 to 1.328           | Yes                     | ***            | 0.0005                  |
| sca7men vs. shRNA7+GFPa7                 | 1.105             | 0.8763 to 1.333           | Yes                     | ***            | 0.0005                  |
| sca7men vs. shRNA7+MEN1men               | 0.01587           | -0.1935 to 0.2252         | No                      | ns             | >0.9999                 |
| sca7men vs. shRNA7+MEN1a7                | -0.1539           | -0.6023 to 0.2946         | No                      | ns             | 0.6644                  |
| sca7a7 vs. sha7men                       | 1.118             | 0.7228 to 1.512           | Yes                     | **             | 0.0023                  |



|                             |           |                     |     |      |         |
|-----------------------------|-----------|---------------------|-----|------|---------|
| sca7a7 vs. sha7a7           | 1.129     | 0.6877 to 1.570     | Yes | **   | 0.0031  |
| sca7a7 vs. sca7+MEEn1men    | -1.226    | -1.788 to -0.6640   | Yes | **   | 0.0050  |
| sca7a7 vs. sca7+MEEn1a7     | -1.881    | -2.684 to -1.078    | Yes | **   | 0.0041  |
| sca7a7 vs. shRNA7+GFPmen    | 1.127     | 0.7172 to 1.536     | Yes | **   | 0.0025  |
| sca7a7 vs. shRNA7+GFPa7     | 1.131     | 0.7185 to 1.543     | Yes | **   | 0.0025  |
| sca7a7 vs. shRNA7+MEEn1men  | 0.04199   | -0.3540 to 0.4379   | No  | ns   | >0.9999 |
| sca7a7 vs. shRNA7+MEEn1a7   | -0.1277   | -0.3408 to 0.08534  | No  | ns   | 0.2047  |
| sha7men vs. sha7a7          | 0.01119   | -0.08651 to 0.1089  | No  | ns   | >0.9999 |
| sha7men vs. sca7+MEEn1men   | -2.344    | -2.543 to -2.144    | Yes | **** | <0.0001 |
| sha7men vs. sca7+MEEn1a7    | -2.999    | -3.734 to -2.264    | Yes | ***  | 0.0008  |
| sha7men vs. shRNA7+GFPmen   | 0.009032  | -0.02286 to 0.04092 | No  | ns   | 0.8362  |
| sha7men vs. shRNA7+GFPa7    | 0.01314   | -0.02001 to 0.04629 | No  | ns   | 0.5219  |
| sha7men vs. shRNA7+MEEn1men | -1.076    | -1.095 to -1.056    | Yes | **** | <0.0001 |
| sha7men vs. shRNA7+MEEn1a7  | -1.245    | -1.779 to -0.7118   | Yes | **   | 0.0041  |
| sha7a7 vs. sca7+MEEn1men    | -2.355    | -2.602 to -2.108    | Yes | **** | <0.0001 |
| sha7a7 vs. sca7+MEEn1a7     | -3.010    | -3.838 to -2.182    | Yes | **   | 0.0011  |
| sha7a7 vs. shRNA7+GFPmen    | -0.002156 | -0.06957 to 0.06525 | No  | ns   | >0.9999 |
| sha7a7 vs. shRNA7+GFPa7     | 0.001949  | -0.06351 to 0.06741 | No  | ns   | >0.9999 |

|                                       |               |                           |                     |         |                     |
|---------------------------------------|---------------|---------------------------|---------------------|---------|---------------------|
| sha7a7 vs.<br>shRNA7+MEEn1men         | -1.087        | -1.177 to -<br>0.9969     | Yes                 | ****    | <0.0001             |
| sha7a7 vs.<br>shRNA7+MEEn1a7          | -1.256        | -1.846 to -<br>0.6666     | Yes                 | **      | 0.0054              |
| sca7+MEEn1men vs.<br>sca7+MEEn1a7     | -0.6551       | -1.305 to -<br>0.005092   | Yes                 | *       | 0.0489              |
| sca7+MEEn1men vs.<br>shRNA7+GFPmen    | 2.353         | 2.143 to<br>2.562         | Yes                 | ****    | <0.0001             |
| sca7+MEEn1men vs.<br>shRNA7+GFPa7     | 2.357         | 2.149 to<br>2.565         | Yes                 | ****    | <0.0001             |
| sca7+MEEn1men vs.<br>shRNA7+MEEn1men  | 1.268         | 1.060 to<br>1.476         | Yes                 | ***     | 0.0002              |
| sca7+MEEn1men vs.<br>shRNA7+MEEn1a7   | 1.098         | 0.4308 to<br>1.766        | Yes                 | *       | 0.0116              |
| sca7+MEEn1a7 vs.<br>shRNA7+GFPmen     | 3.008         | 2.245 to<br>3.770         | Yes                 | ***     | 0.0009              |
| sca7+MEEn1a7 vs.<br>shRNA7+GFPa7      | 3.012         | 2.248 to<br>3.776         | Yes                 | ***     | 0.0009              |
| sca7+MEEn1a7 vs.<br>shRNA7+MEEn1men   | 1.923         | 1.181 to<br>2.666         | Yes                 | **      | 0.0030              |
| sca7+MEEn1a7 vs.<br>shRNA7+MEEn1a7    | 1.753         | 0.9397 to<br>2.567        | Yes                 | **      | 0.0052              |
| shRNA7+GFPmen vs.<br>shRNA7+GFPa7     | 0.004104      | -0.0004204 to<br>0.008629 | No                  | ns      | 0.0661              |
| shRNA7+GFPmen vs.<br>shRNA7+MEEn1men  | -1.085        | -1.108 to -<br>1.061      | Yes                 | ****    | <0.0001             |
| shRNA7+GFPmen vs.<br>shRNA7+MEEn1a7   | -1.254        | -1.808 to -<br>0.7002     | Yes                 | **      | 0.0045              |
| shRNA7+GFPa7 vs.<br>shRNA7+MEEn1men   | -1.089        | -1.116 to -<br>1.061      | Yes                 | ****    | <0.0001             |
| shRNA7+GFPa7 vs.<br>shRNA7+MEEn1a7    | -1.258        | -1.814 to -<br>0.7027     | Yes                 | **      | 0.0045              |
| shRNA7+MEEn1men vs.<br>shRNA7+MEEn1a7 | -0.1697       | -0.7111 to<br>0.3716      | No                  | ns      | 0.7505              |
| Šídák's multiple<br>comparisons test  | Mean<br>Diff. | 95.00% CI of<br>diff.     | Below<br>threshold? | Summary | Adjusted<br>P Value |

|                            |          |                    |     |     |         |
|----------------------------|----------|--------------------|-----|-----|---------|
| sca7men vs. sca7a7         | -0.02612 | -0.3943 to 0.3420  | No  | ns  | >0.9999 |
| sca7men vs. sha7men        | 1.091    | 0.8959 to 1.287    | Yes | *** | 0.0003  |
| sca7men vs. sha7a7         | 1.103    | 0.8114 to 1.394    | Yes | *** | 0.0010  |
| sca7men vs. sca7+MEN1men   | -1.252   | -1.485 to -1.020   | Yes | *** | 0.0003  |
| sca7men vs. sca7+MEN1a7    | -1.907   | -2.479 to -1.335   | Yes | **  | 0.0014  |
| sca7men vs. shRNA7+GFPmen  | 1.100    | 0.8731 to 1.328    | Yes | *** | 0.0005  |
| sca7men vs. shRNA7+GFPa7   | 1.105    | 0.8763 to 1.333    | Yes | *** | 0.0005  |
| sca7men vs. shRNA7+MEN1men | 0.01587  | -0.1935 to 0.2252  | No  | ns  | >0.9999 |
| sca7men vs. shRNA7+MEN1a7  | -0.1539  | -0.6023 to 0.2946  | No  | ns  | 0.6644  |
| sca7a7 vs. sha7men         | 1.118    | 0.7228 to 1.512    | Yes | **  | 0.0023  |
| sca7a7 vs. sha7a7          | 1.129    | 0.6877 to 1.570    | Yes | **  | 0.0031  |
| sca7a7 vs. sca7+MEN1men    | -1.226   | -1.788 to -0.6640  | Yes | **  | 0.0050  |
| sca7a7 vs. sca7+MEN1a7     | -1.881   | -2.684 to -1.078   | Yes | **  | 0.0041  |
| sca7a7 vs. shRNA7+GFPmen   | 1.127    | 0.7172 to 1.536    | Yes | **  | 0.0025  |
| sca7a7 vs. shRNA7+GFPa7    | 1.131    | 0.7185 to 1.543    | Yes | **  | 0.0025  |
| sca7a7 vs. shRNA7+MEN1men  | 0.04199  | -0.3540 to 0.4379  | No  | ns  | >0.9999 |
| sca7a7 vs. shRNA7+MEN1a7   | -0.1277  | -0.3408 to 0.08534 | No  | ns  | 0.2047  |
| sha7men vs. sha7a7         | 0.01119  | -0.08651 to 0.1089 | No  | ns  | >0.9999 |

|                                     |           |                           |     |      |         |
|-------------------------------------|-----------|---------------------------|-----|------|---------|
| sha7men vs.<br>sca7+MEEn1men        | -2.344    | -2.543 to -<br>2.144      | Yes | **** | <0.0001 |
| sha7men vs.<br>sca7+MEEn1a7         | -2.999    | -3.734 to -<br>2.264      | Yes | ***  | 0.0008  |
| sha7men vs.<br>shRNA7+GFPmen        | 0.009032  | -0.02286 to<br>0.04092    | No  | ns   | 0.8362  |
| sha7men vs.<br>shRNA7+GFPa7         | 0.01314   | -0.02001 to<br>0.04629    | No  | ns   | 0.5219  |
| sha7men vs.<br>shRNA7+MEEn1men      | -1.076    | -1.095 to -<br>1.056      | Yes | **** | <0.0001 |
| sha7men vs.<br>shRNA7+MEEn1a7       | -1.245    | -1.779 to -<br>0.7118     | Yes | **   | 0.0041  |
| sha7a7 vs.<br>sca7+MEEn1men         | -2.355    | -2.602 to -<br>2.108      | Yes | **** | <0.0001 |
| sha7a7 vs. sca7+MEEn1a7             | -3.010    | -3.838 to -<br>2.182      | Yes | **   | 0.0011  |
| sha7a7 vs.<br>shRNA7+GFPmen         | -0.002156 | -0.06957 to<br>0.06525    | No  | ns   | >0.9999 |
| sha7a7 vs.<br>shRNA7+GFPa7          | 0.001949  | -0.06351 to<br>0.06741    | No  | ns   | >0.9999 |
| sha7a7 vs.<br>shRNA7+MEEn1men       | -1.087    | -1.177 to -<br>0.9969     | Yes | **** | <0.0001 |
| sha7a7 vs.<br>shRNA7+MEEn1a7        | -1.256    | -1.846 to -<br>0.6666     | Yes | **   | 0.0054  |
| sca7+MEEn1men vs.<br>sca7+MEEn1a7   | -0.6551   | -1.305 to -<br>0.005092   | Yes | *    | 0.0489  |
| sca7+MEEn1a7 vs.<br>shRNA7+GFPmen   | 3.008     | 2.245 to<br>3.770         | Yes | ***  | 0.0009  |
| sca7+MEEn1a7 vs.<br>shRNA7+GFPa7    | 3.012     | 2.248 to<br>3.776         | Yes | ***  | 0.0009  |
| sca7+MEEn1a7 vs.<br>shRNA7+MEEn1men | 1.923     | 1.181 to<br>2.666         | Yes | **   | 0.0030  |
| sca7+MEEn1a7 vs.<br>shRNA7+MEEn1a7  | 1.753     | 0.9397 to<br>2.567        | Yes | **   | 0.0052  |
| shRNA7+GFPmen vs.<br>shRNA7+GFPa7   | 0.004104  | -0.0004204 to<br>0.008629 | No  | ns   | 0.0661  |

|                                     |         |                       |     |      |         |
|-------------------------------------|---------|-----------------------|-----|------|---------|
| shRNA7+GFPmen vs.<br>shRNA7+MEN1men | -1.085  | -1.108 to -<br>1.061  | Yes | **** | <0.0001 |
| shRNA7+GFPmen vs.<br>shRNA7+MEN1a7  | -1.254  | -1.808 to -<br>0.7002 | Yes | **   | 0.0045  |
| shRNA7+GFPa7 vs.<br>shRNA7+MEN1men  | -1.089  | -1.116 to -<br>1.061  | Yes | **** | <0.0001 |
| shRNA7+GFPa7 vs.<br>shRNA7+MEN1a7   | -1.258  | -1.814 to -<br>0.7027 | Yes | **   | 0.0045  |
| shRNA7+MEN1men vs.<br>shRNA7+MEN1a7 | -0.1697 | -0.7111 to<br>0.3716  | No  | ns   | 0.7505  |

One-way ANOVA followed by Post-hoc-Tukey's multiple comparison test  
qPCR (n=6, 3 independent experiments each, triplicate replicates)

Supplementary Table S16. Related to Figure 9C. Statistical analysis of ICC fluorescence of PSD-95 in hippocampal neuronal cultures DIV 3-20 in  $\alpha 7$  nAChR scrambled AAV,  $\alpha 7$  nAChR shRNA AAV,  $\alpha 7$  nAChR scrambled AAV+MEN1,  $\alpha 7$  nAChR AAV+MEN1AAV and  $\alpha 7$  nAChR AAV+GFP AAV treated hippocampal neuronal cultures

| <b>Tukey's multiple comparisons test</b>                   | <b>Mean Diff.</b> | <b>95.00% CI of diff.</b> | <b>Below threshold?</b> | <b>Summary</b> | <b>Adjusted P Value</b> |
|------------------------------------------------------------|-------------------|---------------------------|-------------------------|----------------|-------------------------|
| Row 1                                                      |                   |                           |                         |                |                         |
| $\alpha 7$ scrambled AAV vs. $\alpha 7$ shRNA AAV          | 4.833             | 0.3414 to 9.325           | Yes                     | *              | 0.0279                  |
| $\alpha 7$ scrambled AAV vs. $\alpha 7$ scrambled+MEN1 AAV | -2.167            | -6.659 to 2.325           | No                      | ns             | 0.6762                  |
| $\alpha 7$ scrambled AAV vs. $\alpha 7$ shRNA AAV +GFP     | 7.667             | 3.175 to 12.16            | Yes                     | ****           | <0.0001                 |
| $\alpha 7$ scrambled AAV vs. $\alpha 7$ shRNA+MEN1 AAV     | 5.083             | 0.5914 to 9.575           | Yes                     | *              | 0.0176                  |
| $\alpha 7$ shRNA AAV vs. $\alpha 7$ scrambled+MEN1 AAV     | -7.000            | -11.49 to -2.508          | Yes                     | ***            | 0.0002                  |

|                                                                         |        |                  |     |      |         |
|-------------------------------------------------------------------------|--------|------------------|-----|------|---------|
| $\alpha 7$ shRNA AAV<br>vs. $\alpha 7$ shRNA<br>AAV +GFP                | 2.833  | -1.659 to 7.325  | No  | ns   | 0.4160  |
| $\alpha 7$ shRNA AAV<br>vs. $\alpha 7$<br>shRNA+MEN1<br>AAV             | 0.2500 | -4.242 to 4.742  | No  | ns   | 0.9999  |
| Row 2                                                                   |        |                  |     |      |         |
| $\alpha 7$ scrambled AAV<br>vs. $\alpha 7$ shRNA<br>AAV                 | 56.92  | 52.42 to 61.41   | Yes | **** | <0.0001 |
| $\alpha 7$ scrambled AAV<br>vs. $\alpha 7$<br>scrambled+MEN1<br>AAV     | -12.08 | -16.58 to -7.591 | Yes | **** | <0.0001 |
| $\alpha 7$ scrambled AAV<br>vs. $\alpha 7$ shRNA<br>AAV +GFP            | 54.50  | 50.01 to 58.99   | Yes | **** | <0.0001 |
| $\alpha 7$ scrambled AAV<br>vs. $\alpha 7$<br>shRNA+MEN1<br>AAV         | 15.00  | 10.51 to 19.49   | Yes | **** | <0.0001 |
| $\alpha 7$ shRNA AAV<br>vs. $\alpha 7$<br>scrambled+MEN1<br>AAV         | -69.00 | -73.49 to -64.51 | Yes | **** | <0.0001 |
| $\alpha 7$ shRNA AAV<br>vs. $\alpha 7$ shRNA<br>AAV +GFP                | -2.417 | -6.909 to 2.075  | No  | ns   | 0.5781  |
| $\alpha 7$ shRNA AAV<br>vs. $\alpha 7$<br>shRNA+MEN1<br>AAV             | -41.92 | -46.41 to -37.42 | Yes | **** | <0.0001 |
| $\alpha 7$<br>scrambled+MEN1<br>AAV vs. $\alpha 7$<br>shRNA AAV<br>+GFP | 66.58  | 62.09 to 71.08   | Yes | **** | <0.0001 |
| $\alpha 7$<br>scrambled+MEN1<br>AAV vs. $\alpha 7$<br>shRNA+MEN1<br>AAV | 27.08  | 22.59 to 31.58   | Yes | **** | <0.0001 |
| $\alpha 7$ shRNA AAV<br>+GFP vs. $\alpha 7$                             | -39.50 | -43.99 to -35.01 | Yes | **** | <0.0001 |

|                                                                         |         |                  |     |      |         |
|-------------------------------------------------------------------------|---------|------------------|-----|------|---------|
| shRNA+MEN1<br>AAV                                                       |         |                  |     |      |         |
| Row 3                                                                   |         |                  |     |      |         |
| $\alpha 7$ scrambled AAV<br>vs. $\alpha 7$ shRNA<br>AAV                 | 64.25   | 59.76 to 68.74   | Yes | **** | <0.0001 |
| $\alpha 7$ scrambled AAV<br>vs. $\alpha 7$<br>scrambled+MEN1<br>AAV     | -13.50  | -17.99 to -9.008 | Yes | **** | <0.0001 |
| $\alpha 7$ scrambled AAV<br>vs. $\alpha 7$ shRNA<br>AAV +GFP            | 64.08   | 59.59 to 68.58   | Yes | **** | <0.0001 |
| $\alpha 7$ scrambled AAV<br>vs. $\alpha 7$<br>shRNA+MEN1<br>AAV         | 6.417   | 1.925 to 10.91   | Yes | **   | 0.0010  |
| $\alpha 7$ shRNA AAV<br>vs. $\alpha 7$<br>scrambled+MEN1<br>AAV         | -77.75  | -82.24 to -73.26 | Yes | **** | <0.0001 |
| $\alpha 7$ shRNA AAV<br>vs. $\alpha 7$ shRNA<br>AAV +GFP                | -0.1667 | -4.659 to 4.325  | No  | ns   | >0.9999 |
| $\alpha 7$ shRNA AAV<br>vs. $\alpha 7$<br>shRNA+MEN1<br>AAV             | -57.83  | -62.33 to -53.34 | Yes | **** | <0.0001 |
| $\alpha 7$<br>scrambled+MEN1<br>AAV vs. $\alpha 7$<br>shRNA AAV<br>+GFP | 77.58   | 73.09 to 82.08   | Yes | **** | <0.0001 |
| $\alpha 7$<br>scrambled+MEN1<br>AAV vs. $\alpha 7$<br>shRNA+MEN1<br>AAV | 19.92   | 15.42 to 24.41   | Yes | **** | <0.0001 |
| $\alpha 7$ shRNA AAV<br>+GFP vs. $\alpha 7$<br>shRNA+MEN1<br>AAV        | -57.67  | -62.16 to -53.17 | Yes | **** | <0.0001 |
|                                                                         |         |                  |     |      |         |
| Row 4                                                                   |         |                  |     |      |         |

|                                                                         |        |                  |     |      |         |
|-------------------------------------------------------------------------|--------|------------------|-----|------|---------|
| $\alpha 7$ scrambled AAV<br>vs. $\alpha 7$ shRNA<br>AAV                 | 54.42  | 49.92 to 58.91   | Yes | **** | <0.0001 |
| $\alpha 7$ scrambled AAV<br>vs. $\alpha 7$<br>scrambled+MEN1<br>AAV     | -22.17 | -26.66 to -17.67 | Yes | **** | <0.0001 |
| $\alpha 7$ scrambled AAV<br>vs. $\alpha 7$ shRNA<br>AAV +GFP            | 55.92  | 51.42 to 60.41   | Yes | **** | <0.0001 |
| $\alpha 7$ scrambled AAV<br>vs. $\alpha 7$<br>shRNA+MEN1<br>AAV         | -1.250 | -5.742 to 3.242  | No  | ns   | 0.9406  |
| $\alpha 7$ shRNA AAV<br>vs. $\alpha 7$<br>scrambled+MEN1<br>AAV         | -76.58 | -81.08 to -72.09 | Yes | **** | <0.0001 |
| $\alpha 7$ shRNA AAV<br>vs. $\alpha 7$ shRNA<br>AAV +GFP                | 1.500  | -2.992 to 5.992  | No  | ns   | 0.8902  |
| $\alpha 7$ shRNA AAV<br>vs. $\alpha 7$<br>shRNA+MEN1<br>AAV             | -55.67 | -60.16 to -51.17 | Yes | **** | <0.0001 |
| $\alpha 7$<br>scrambled+MEN1<br>AAV vs. $\alpha 7$<br>shRNA AAV<br>+GFP | 78.08  | 73.59 to 82.58   | Yes | **** | <0.0001 |
| $\alpha 7$<br>scrambled+MEN1<br>AAV vs. $\alpha 7$<br>shRNA+MEN1<br>AAV | 20.92  | 16.42 to 25.41   | Yes | **** | <0.0001 |
| $\alpha 7$ shRNA AAV<br>+GFP vs. $\alpha 7$<br>shRNA+MEN1<br>AAV        | -57.17 | -61.66 to -52.67 | Yes | **** | <0.0001 |
|                                                                         |        |                  |     |      |         |
| Row 5                                                                   |        |                  |     |      |         |
| $\alpha 7$ scrambled AAV<br>vs. $\alpha 7$ shRNA<br>AAV                 | 54.42  | 49.92 to 58.91   | Yes | **** | <0.0001 |
| $\alpha 7$ scrambled AAV<br>vs. $\alpha 7$                              | -19.42 | -23.91 to -14.92 | Yes | **** | <0.0001 |



|                                                             |        |                  |     |      |         |
|-------------------------------------------------------------|--------|------------------|-----|------|---------|
| scrambled+MEN1 AAV                                          |        |                  |     |      |         |
| $\alpha 7$ scrambled AAV vs. $\alpha 7$ shRNA AAV +GFP      | 56.42  | 51.92 to 60.91   | Yes | **** | <0.0001 |
| $\alpha 7$ scrambled AAV vs. $\alpha 7$ shRNA+MEN1 AAV      | -1.083 | -5.575 to 3.409  | No  | ns   | 0.9642  |
| $\alpha 7$ shRNA AAV vs. $\alpha 7$ scrambled+MEN1 AAV      | -73.83 | -78.33 to -69.34 | Yes | **** | <0.0001 |
| $\alpha 7$ shRNA AAV vs. $\alpha 7$ shRNA AAV +GFP          | 2.000  | -2.492 to 6.492  | No  | ns   | 0.7382  |
| $\alpha 7$ shRNA AAV vs. $\alpha 7$ shRNA+MEN1 AAV          | -55.50 | -59.99 to -51.01 | Yes | **** | <0.0001 |
| $\alpha 7$ scrambled+MEN1 AAV vs. $\alpha 7$ shRNA AAV +GFP | 75.83  | 71.34 to 80.33   | Yes | **** | <0.0001 |
| $\alpha 7$ scrambled+MEN1 AAV vs. $\alpha 7$ shRNA+MEN1 AAV | 18.33  | 13.84 to 22.83   | Yes | **** | <0.0001 |
| $\alpha 7$ shRNA AAV +GFP vs. $\alpha 7$ shRNA+MEN1 AAV     | -57.50 | -61.99 to -53.01 | Yes | **** | <0.0001 |

Two-way ANOVA followed by Post-hoc Tukey's multiple comparison test

n refers to the analysis of menin-C puncta fluorescence intensity within neuronal cultures, ROIs derived from 35 separate images from 5 independent experiments, 7 samples

Supplementary Table S17. Related to Figure 10C. Statistical analysis ratio of freezing episodes from day 2 to day 1 in  $\alpha 7$  nAChR scrambled AAV,  $\alpha 7$  nAChR shRNA AAV,  $\alpha 7$  nAChR AAV+MEN1AAV injected mice

| <b>Dunnett's multiple comparisons test</b>              | <b>Mean Diff.</b> | <b>95.00% CI of diff.</b> | <b>Below threshold?</b> | <b>Summary</b> | <b>Adjusted P Value</b> |
|---------------------------------------------------------|-------------------|---------------------------|-------------------------|----------------|-------------------------|
| $\alpha 7$ scrambled AAV vs. $\alpha 7$ shRNA AAV       | 47.60             | 44.42 to 50.78            | Yes                     | ****           | <0.0001                 |
| $\alpha 7$ scrambled AAV vs. $\alpha 7$ shRNA AAV +MEN1 | 5.933             | 2.754 to 9.113            | Yes                     | ***            | 0.0002                  |

Ono-way ANOVA followed by Dunette's multiple comparison test  
n refers to 15 animals per group

Supplementary Table S18. Related to Figure S6. Statistical analysis ratio of freezing percentages 1 in  $\alpha 7$  nAChR scrambled AAV,  $\alpha 7$  nAChR shRNA AAV,  $\alpha 7$  nAChR scrambled AAV,+MEN1 AAV,  $\alpha 7$  nAChR AAV+MEN1AAV injected mice

| <b>Dunnett's multiple comparisons test</b>                  | <b>Mean Diff.</b> | <b>95.00% CI of diff.</b> | <b>Below threshold?</b> | <b>Summary</b> | <b>Adjusted P Value</b> |
|-------------------------------------------------------------|-------------------|---------------------------|-------------------------|----------------|-------------------------|
| $\alpha 7$ scrambled AAV vs. $\alpha 7$ shRNA AAV           | 46.33             | 42.38 to 50.29            | Yes                     | *****          | <0.0001                 |
| $\alpha 7$ scrambled AAV vs. $\alpha 7$ shRNA AAV +MEN1     | 2.867             | -1.091 to 6.824           | No                      | ns             | 0.2043                  |
| $\alpha 7$ scrambled AAV vs. $\alpha 7$ scrambled +MEN1 AAV | -0.9190           | -4.946 to 3.108           | No                      | ns             | 0.9034                  |

Ono-way ANOVA followed by Dunette's multiple comparison test  
n refers to 15 animals per group



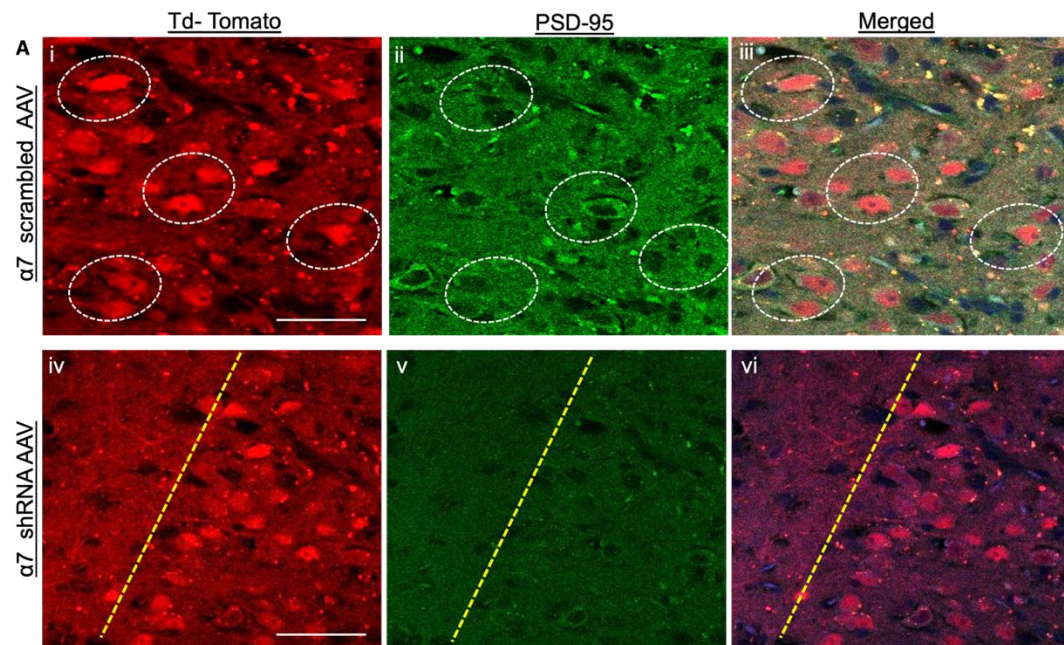

## FIGURE S2

PSD-95 expression reduces in  $\alpha 7$  KD hippocampal slices (*in-vivo*). (A) IHC characterization of  $\alpha 7$  KD hippocampal slices (Aiv-vi) 8 weeks old. mice (n = 20 images, 5 independent samples, representative image) compared to scrambled controls (Ai-iii).  $\alpha 7$  KD hippocampal slices labelled td-tomato positive neurons (Ai,iv) labelled with PSD-95 (postsynaptic marker) (Aii,v) and merged (Aiii,vi) exhibiting reduced expression of PSD-95 in CA1 neurons.

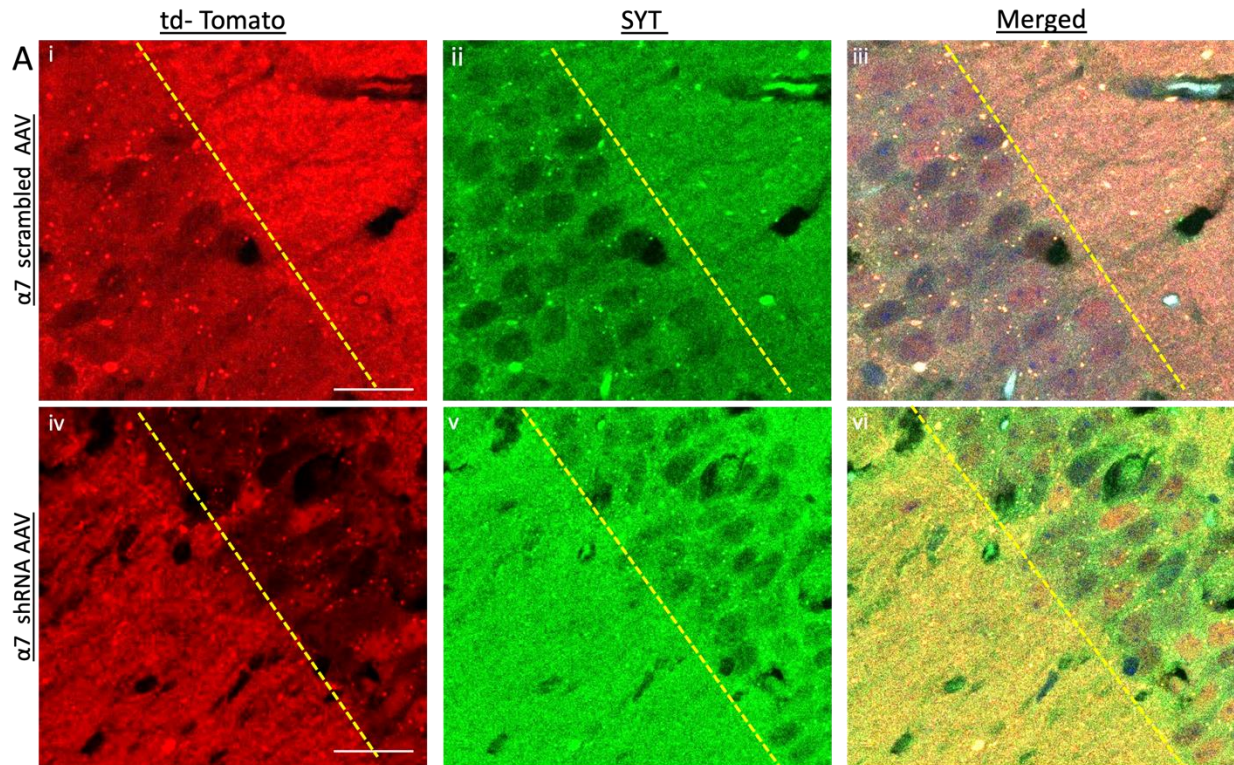

### FIGURE S3

SYT expression increases in  $\alpha 7$  KD hippocampal slices (*in-vivo*). (A) IHC characterization of  $\alpha 7$  KD hippocampal slices (Aiv-vi) 8 weeks old. mice ( $n = 20$  images, 5 independent samples, representative image) compared to scrambled controls (Ai-iii).  $\alpha 7$  KD hippocampal slices labelled td-tomato positive neurons (Ai,iv) labelled with SYT (presynaptic marker) (Aii,v) and merged (Aiii,vi) exhibiting increased expression of PSD-95 in CA1 neurons.



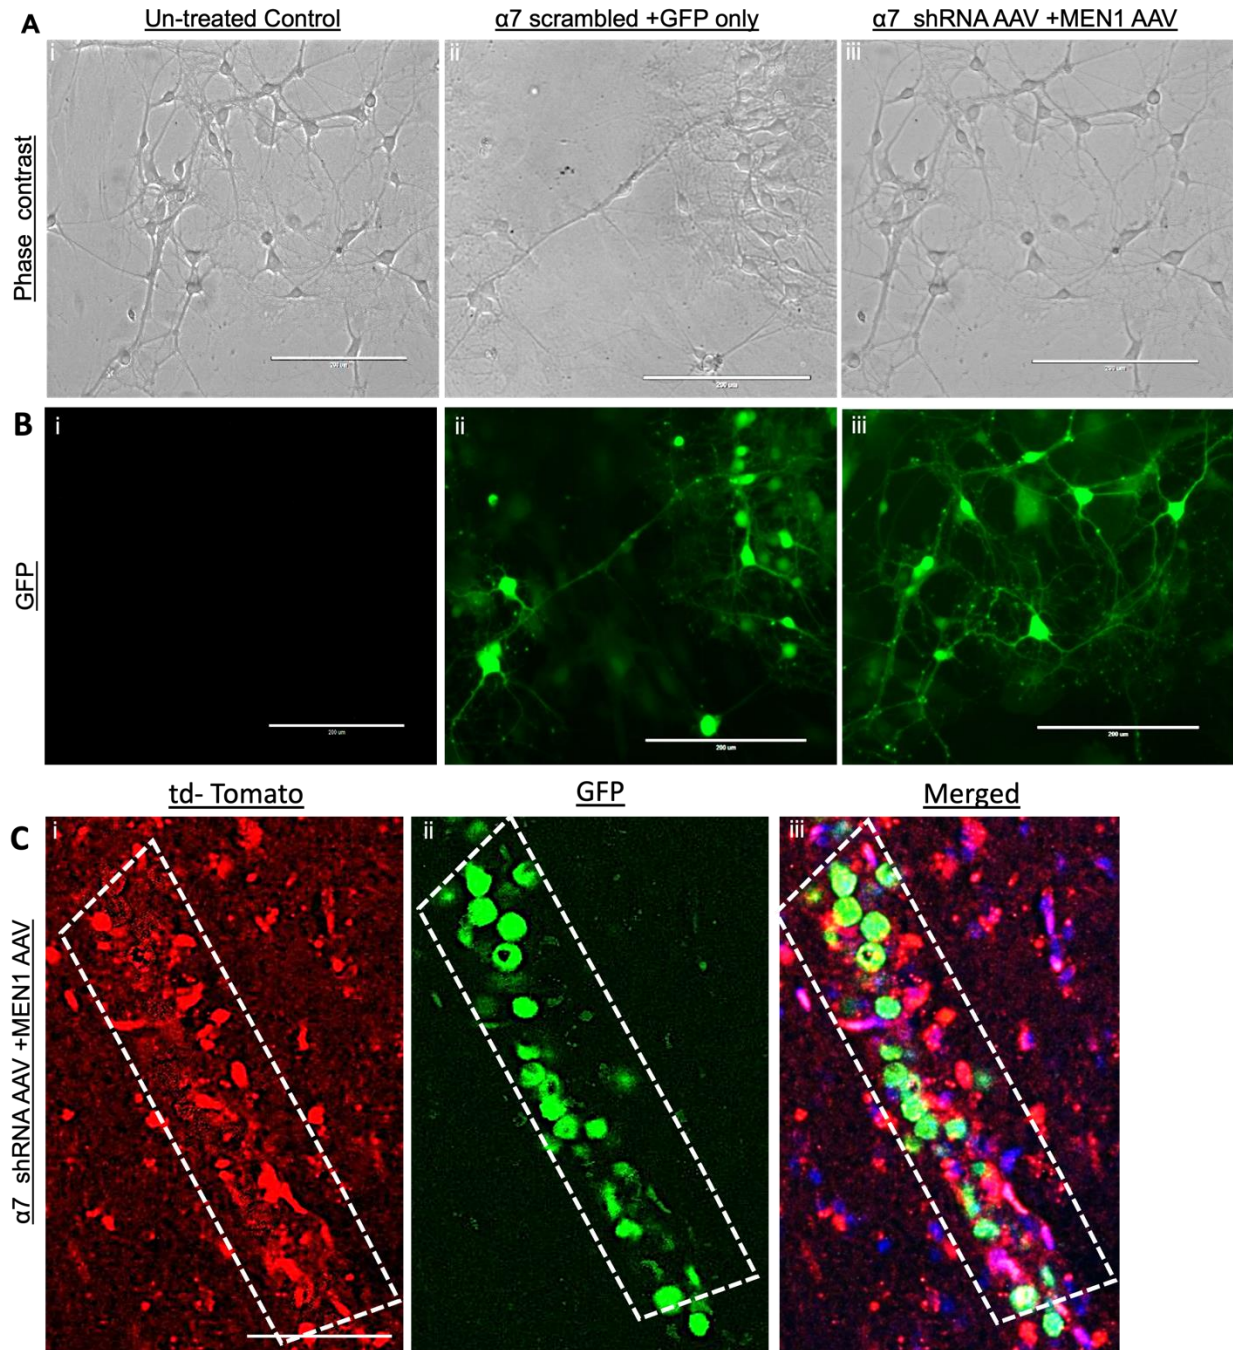

# **FIGURE S4**

Co-expression of  $\alpha 7$  shRNA AAV and MEN1 encoding AAV. (A) live cell phase contrast (i-iii), (B) GFP fluorescence (i-iii); images of untreated control (Ai,Bi), scrambled control (Aii, Bii) and MEN1 encoding AAV (Aiii,Biii) AAV transduced hippocampal cultures at DIV 7 (n=21 images, 7 independent samples each, representative images). (C) Co expression of tdTomato and GFP in the CA1 specific neurons. Scale bar (A-B)200 $\mu$ m, (C)75  $\mu$ m



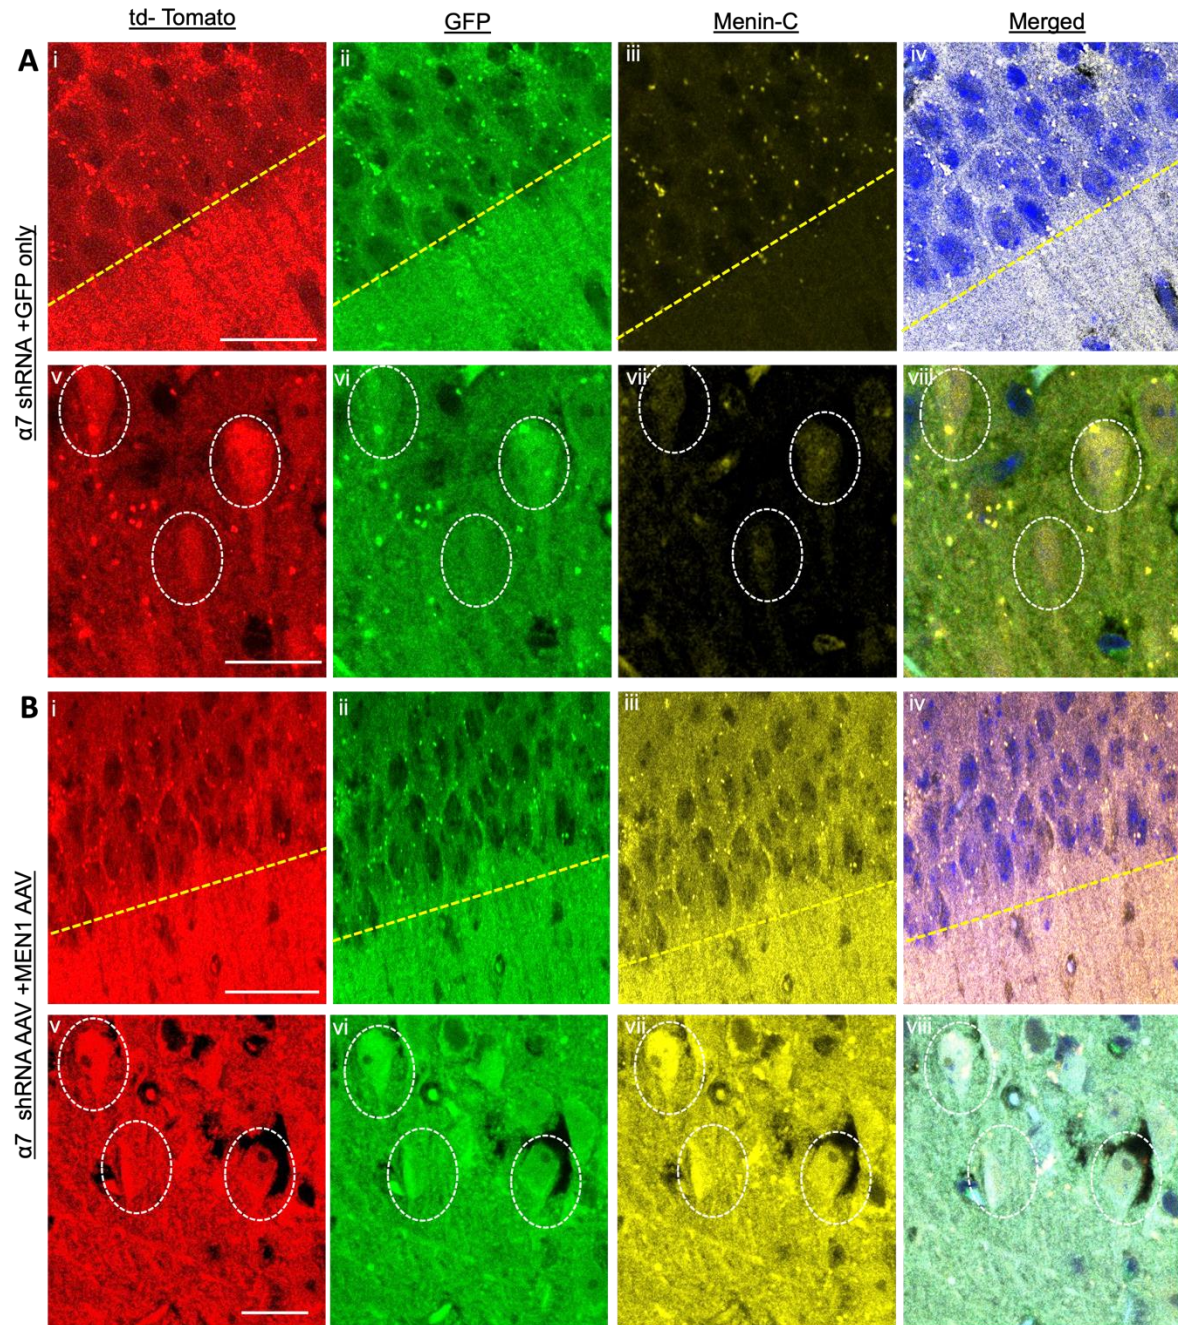

**FIGURE S5**

Menin-C expression reduces in  $\alpha 7$  KD hippocampal slices (*in-vivo*). (A) IHC characterization of  $\alpha 7$  KD hippocampal slices (Ai-viii) 12 weeks old. mice (n = 20 images, 5 independent samples, representative image).  $\alpha 7$  KD+GFP only hippocampal slices labelled td-tomato positive (Ai,v)+GFP positive neurons (Aii,vi) labelled with menin-C (Aiii,vii) and merged (Aiv,viii), (Av-viii) zoomed in CA1 neurons exhibiting reduced menin-C expression.  $\alpha 7$  KD+MEN1 encoding AAV hippocampal slices labelled td-tomato positive (Ai,v)+GFP positive neurons (Aii,vi) labelled with menin-C (Aiii,vii) and merged (Aiv,viii), (Av-viii) zoomed in CA1 neurons exhibiting increased menin-C expression

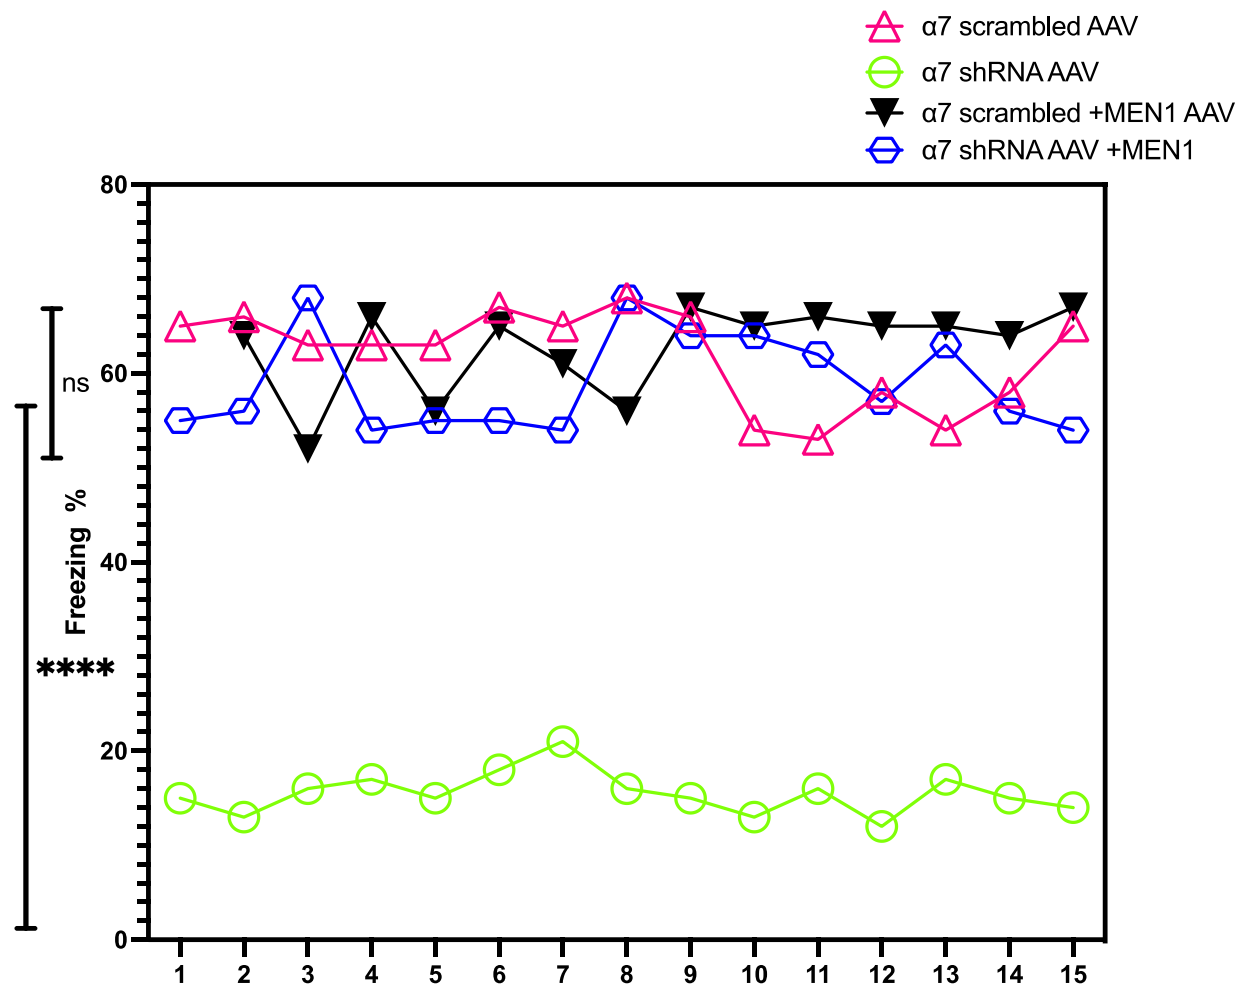

**FIGURE S6**

(A) Summary data, freezing percentage in four groups (n=15). Data shows deficits in learning and memory in  $\alpha 7$  KD mice, whereas improvement in learning and memory in  $\alpha 7$  KD+ MEN1 AAV mice. Scale bar, (Ai-iv) 20  $\mu$ m, (Aiv-vi) 25  $\mu$ m.
